# Supplementary material
Source: PubMed Central journal article supplement (PMC524441)

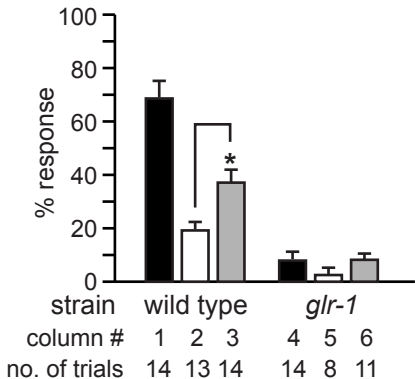

■ nose touch on food

□ nose touch off food 10 min.

■ nose touch off food 10 min.+ 4 mM 5-HT

Supplement: pnas_101_43_15512__1.pdf [file pnas_101_43_15512__1.pdf]

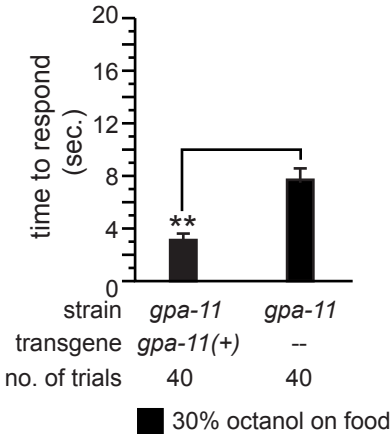

Supplement: pnas_101_43_15512__2.pdf [file pnas_101_43_15512__2.pdf]

**A.**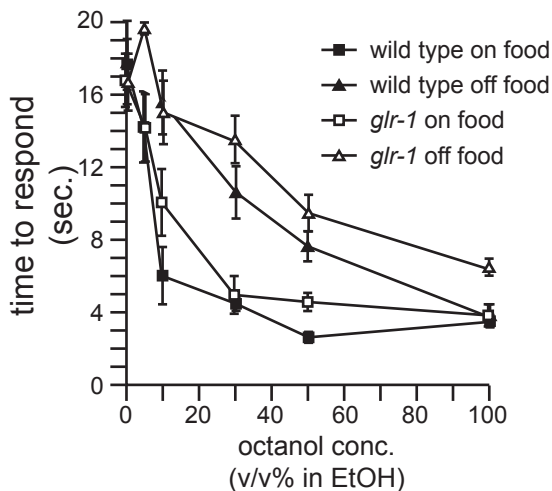**B.**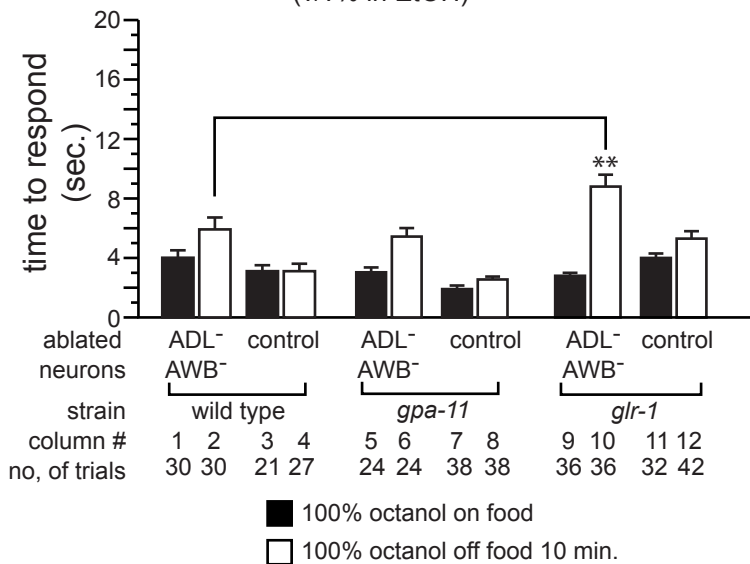

Supplement: pnas_101_43_15512__3.pdf [file pnas_101_43_15512__3.pdf]
